# Supplementary material for: No causal effect of tea consumption on cardiovascular diseases: A two-sample Mendelian randomization study
Source: Frontiers journal article supplement (doi:10.3389/fcvm.2022.870972), 2022-09-07
Supplement: Data_Sheet_1.pdf [file Data_Sheet_1.pdf]

## Supplementary Material

### 1 Supplementary Figures and Tables

#### 1.1 Supplementary Figures

**Supplementary Figure 1.** The flowchart of selection of instrumental variables with P-values  $< 5 \times 10^{-7}$ .

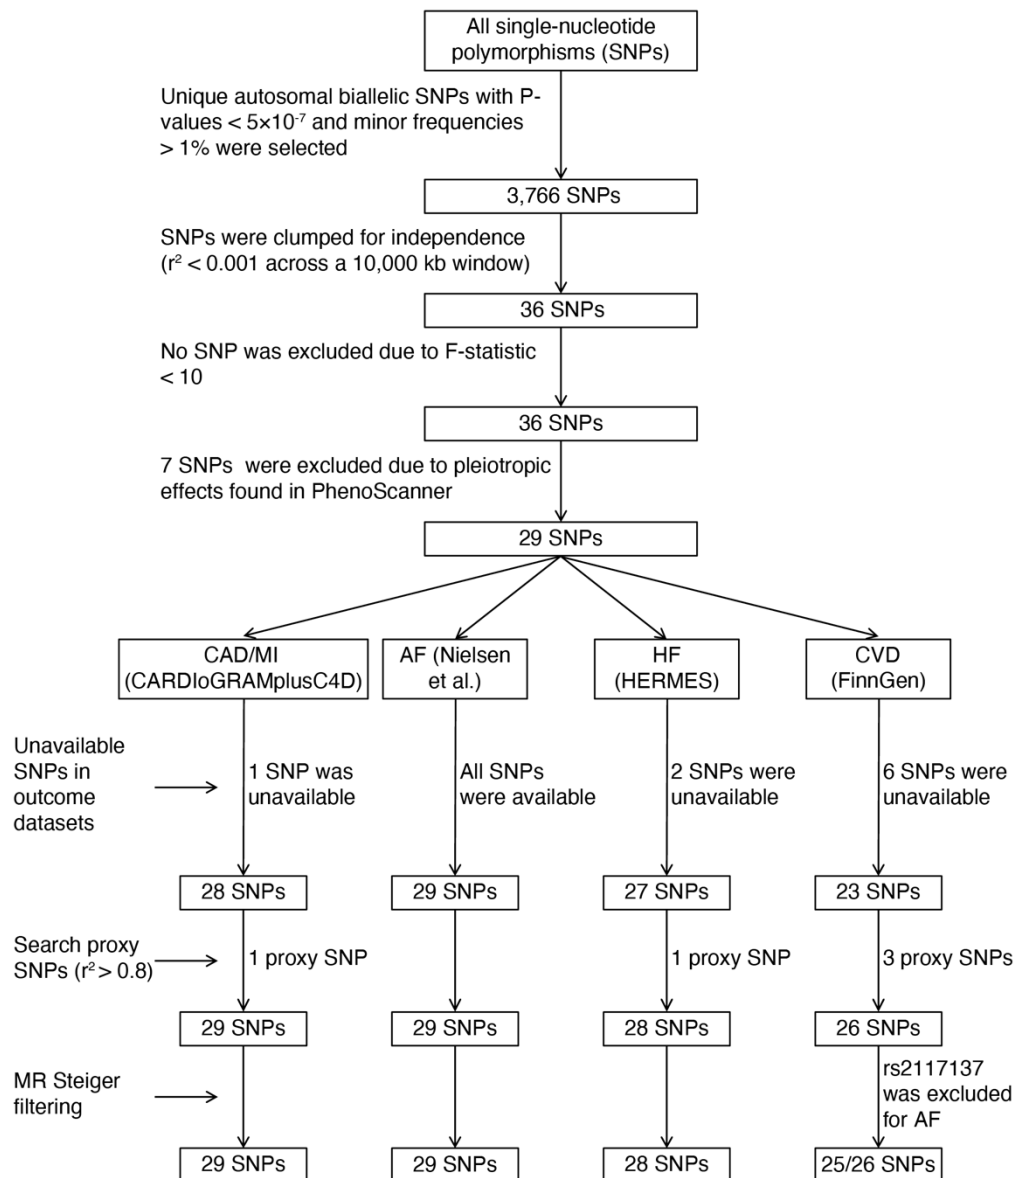

CAD, coronary artery disease; MI, myocardial infarction; AF, atrial fibrillation; HF, heart failure; CVD, cardiovascular disease; CARDIoGRAMplusC4D, Coronary ARtery DIsease Genome-wide Replication and Meta-analysis (CARDIoGRAM) plus The Coronary Artery Disease (C4D) Genetics; HERMES, Heart Failure Molecular Epidemiology for Therapeutic Targets.

**Supplementary Figure 2.** Leave-one-out analysis of tea consumption on A) coronary artery disease, B) myocardial infarction, C) atrial fibrillation, and D) heart failure in the corresponding genetic consortia.

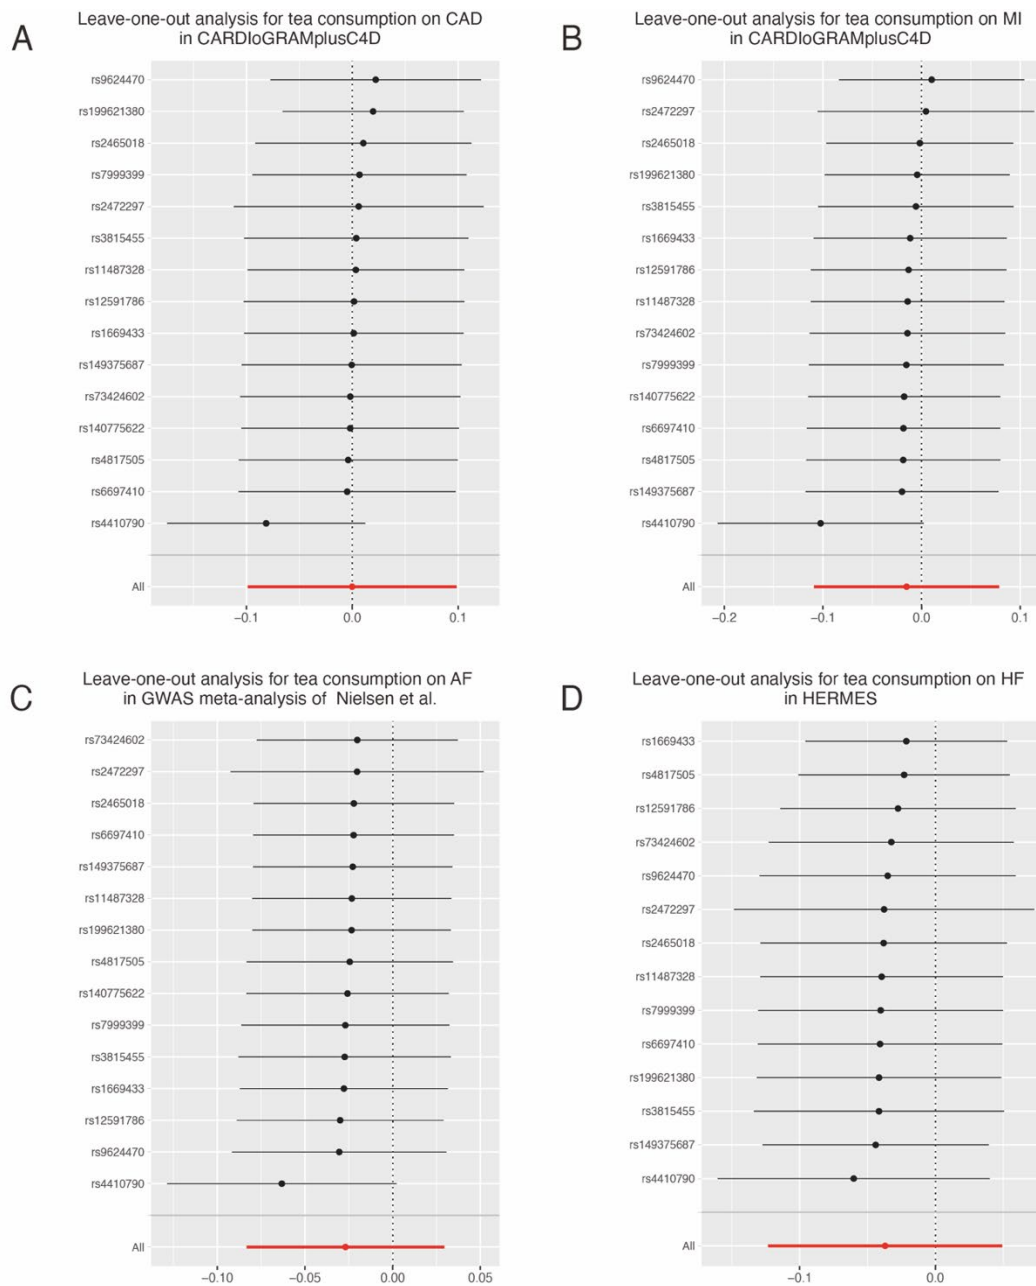

CAD, coronary artery disease; MI, myocardial infarction; AF, atrial fibrillation; HF, heart failure; CARDIoGRAMplusC4D, Coronary ARtery DIsease Genome-wide Replication and Meta-analysis

(CARDIoGRAM) plus The Coronary Artery Disease (C4D) Genetics; HERMES, Heart Failure Molecular Epidemiology for Therapeutic Targets; GWAS, genome-wide association studies.

**Supplementary Figure 3.** Leave-one-out analysis of tea consumption on A) coronary artery disease, B) myocardial infarction, C) atrial fibrillation, and D) heart failure in the FinnGen consortium.

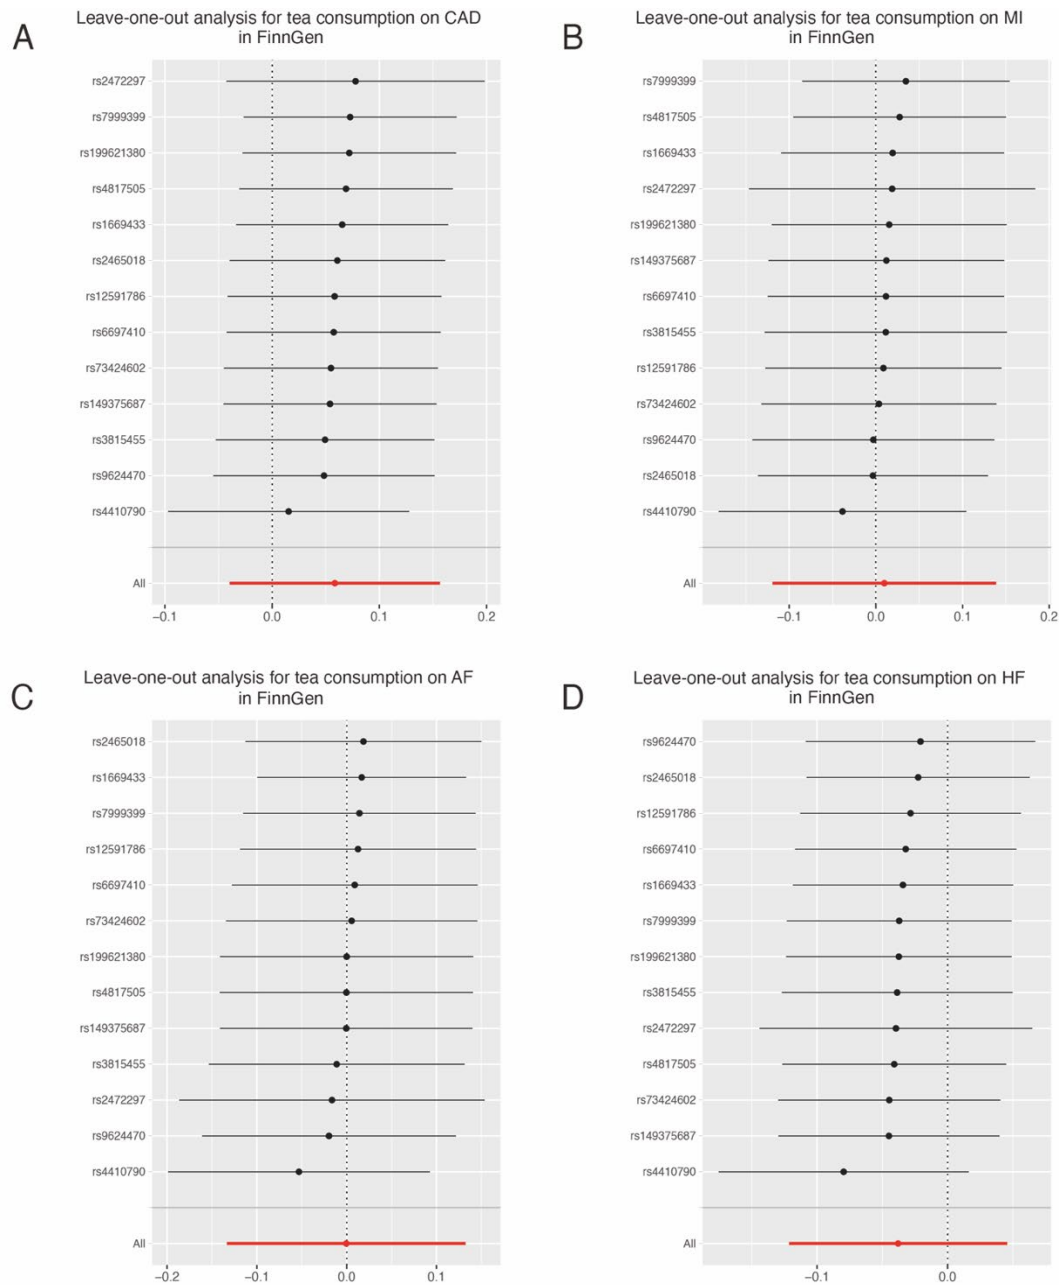

CAD, coronary artery disease; MI, myocardial infarction; AF, atrial fibrillation; HF, heart failure.

**Supplementary Figure 4.** Mendelian randomization associations of tea consumption with risk of cardiovascular diseases with instrumental variables selected at P-value threshold of  $5 \times 10^{-7}$ .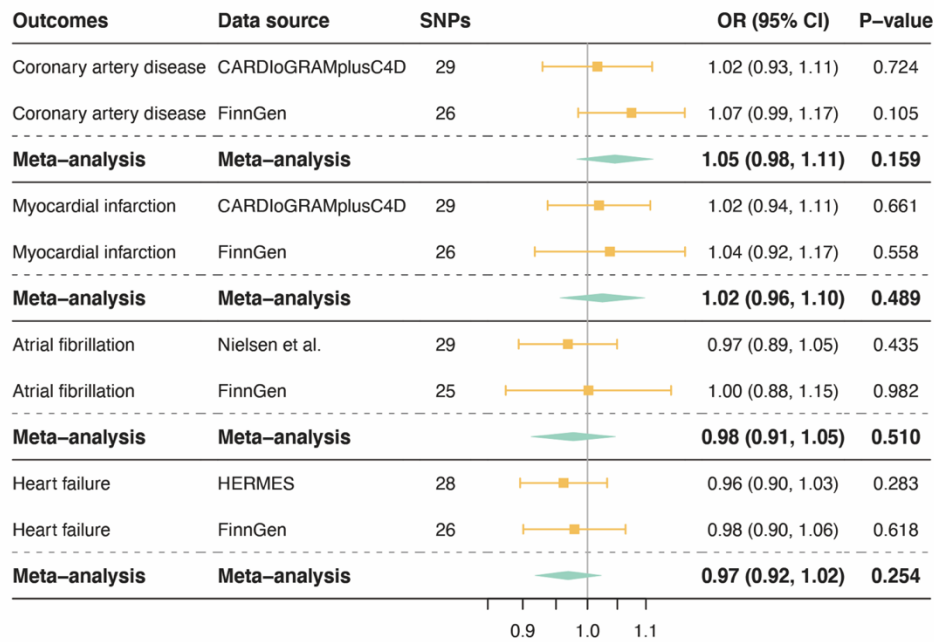

SNPs, single nucleotide polymorphisms; OR, odds ratio; CI, confidence interval; CARDIoGRAMplusC4D, Coronary ARtery Disease Genome-wide Replication and Meta-analysis (CARDIoGRAM) plus The Coronary Artery Disease (C4D) Genetics; HERMES, Heart Failure Molecular Epidemiology for Therapeutic Targets.

## 1.2 Supplementary Tables

**Supplementary Table 2.** Association of potential pleiotropic SNPs with established risk factors for cardiovascular diseases.

| P-value cut-off | SNPs       | EA | NEA | Trait                                                               | Beta   | P        | PMID     |
|-----------------|------------|----|-----|---------------------------------------------------------------------|--------|----------|----------|
| 5.00E-08        | rs1481012  | A  | G   | Cholesterol ldl                                                     | NA     | 2.00E-15 | 22331829 |
| 5.00E-08        | rs11022751 | C  | T   | Body mass index                                                     | -0.016 | 4.19E-09 | UKBB     |
|                 |            | C  | T   | Diastolic blood pressure                                            | -0.016 | 1.74E-08 | UKBB     |
| 5.00E-08        | rs2315024  | A  | T   | Self-reported high cholesterol                                      | -0.005 | 4.02E-09 | UKBB     |
| 5.00E-08        | rs12600469 | G  | T   | Weight                                                              | -0.012 | 1.72E-08 | UKBB     |
| 5.00E-07        | rs9937521  | C  | T   | Body mass index                                                     | -0.071 | 2.04E-57 | 28892062 |
|                 |            | C  | T   | Type II diabetes                                                    | -0.128 | 3.80E-22 | 26551672 |
| 5.00E-07        | rs1156954  | A  | G   | Ever smoked                                                         | 0.008  | 1.77E-09 | UKBB     |
| 5.00E-07        | rs4757390  | A  | T   | Vascular or heart problems diagnosed by doctor: high blood pressure | 0.007  | 1.65E-11 | UKBB     |
|                 |            | A  | T   | Self-reported hypertension                                          | 0.007  | 7.29E-10 | UKBB     |

SNPs, single nucleotide polymorphisms; EA, effect alleles; UKBB, the UK Biobank; NEA, non-effect alleles; ldl, low-density lipoprotein. The reported Beta and P-value were obtained from PhenoScanner v2 on February 10, 2022.

**Supplementary Table 3.** Proxy search results for tea consumption-associated SNPs which were not available in the outcome datasets.

| Outcome traits | Data sources      | SNPs        | Beta   | SE    | P-value  | EA | NEA | Proxy SNP  | r <sup>2</sup> |
|----------------|-------------------|-------------|--------|-------|----------|----|-----|------------|----------------|
| CAD/MI         | CARDIoGRAMplusC4D | rs199621380 | 0.041  | 0.007 | 4.53E-09 | G  | T   | rs6678013  | 0.98           |
| HF             | HERMES            | rs140775622 | 0.071  | 0.010 | 9.33E-13 | T  | C   | NA         | NA             |
| HF             | HERMES            | rs199621380 | 0.041  | 0.007 | 4.53E-09 | G  | T   | rs6678013  | 0.98           |
| CAD/MI/AF/HF   | FinnGen           | rs140775622 | 0.071  | 0.010 | 9.33E-13 | T  | C   | NA         | NA             |
| CAD/MI/AF/HF   | FinnGen           | rs11487328  | -0.049 | 0.007 | 5.16E-12 | C  | G   | NA         | NA             |
| CAD/MI/AF/HF   | FinnGen           | rs199621380 | 0.041  | 0.007 | 4.53E-09 | G  | T   | rs6678013  | 0.98           |
| CAD/MI/AF/HF   | FinnGen           | rs2117137   | 0.037  | 0.007 | 1.42E-07 | G  | A   | rs7637670  | 0.92           |
| CAD/MI/AF/HF   | FinnGen           | rs11893458  | 0.036  | 0.007 | 3.79E-07 | T  | A   | rs62183782 | 0.82           |
| CAD/MI/AF/HF   | FinnGen           | rs114002124 | -0.076 | 0.015 | 3.85E-07 | A  | G   | NA         | NA             |

SNPs, single nucleotide polymorphisms; EA, effect alleles; NEA, non-effect alleles; SE, standard error; NA, not available; CARDIoGRAMplusC4D, Coronary ARtery Disease Genome-wide Replication and Meta-analysis (CARDIoGRAM) plus The Coronary Artery Disease (C4D) Genetics; HERMES, Heart Failure Molecular Epidemiology for Therapeutic Targets.

**Supplementary Table 4.** Power calculation for two-sample MR analyses of tea consumption on 4 cardiovascular diseases by adopting instrumental variables at the genome-wide significance level.

| Outcome traits          | Data sources      | Outcome category | Sample size | $\alpha$ | K          | R <sup>2</sup> | Required OR <sup>†</sup> |
|-------------------------|-------------------|------------------|-------------|----------|------------|----------------|--------------------------|
| Coronary artery disease | CARDIoGRAMplusC4D | Binary           | 184,305     | 0.05     | 0.32989338 | 0.00374335     | 0.791 or 1.243           |
| Coronary artery disease | FinnGen           | Binary           | 260,405     | 0.05     | 0.0987193  | 0.00345941     | 0.699 or 1.320           |
| Myocardial infarction   | CARDIoGRAMplusC4D | Binary           | 171,875     | 0.05     | 0.25411491 | 0.00374335     | 0.764 or 1.268           |
| Myocardial infarction   | FinnGen           | Binary           | 238,338     | 0.05     | 0.06623786 | 0.00345941     | 0.621 or 1.399           |
| Atrial fibrillation     | Nielsen et al.    | Binary           | 1,030,836   | 0.05     | 0.05880664 | 0.00374335     | 0.811 or 1.193           |
| Atrial fibrillation     | FinnGen           | Binary           | 164,491     | 0.05     | 0.17429525 | 0.00345941     | 0.709 or 1.323           |
| Heart failure           | HERMES            | Binary           | 977,323     | 0.05     | 0.04840672 | 0.00359739     | 0.783 or 1.221           |
| Heart failure           | FinnGen           | Binary           | 259,710     | 0.05     | 0.1158908  | 0.00345941     | 0.720 or 1.299           |

Note: Power calculation for binary outcomes was performed in <https://shiny.cnsgenomics.com/mRnd/> by inputting the number of sample size,  $\alpha$ , K, R<sup>2</sup> and the required OR to reach the statistical power of 80%.

Example for power calculation for coronary artery disease in CARDIoGRAMplusC4D: choose the binary outcome and power calculation first. Then input the number of sample size (184,305),  $\alpha$  (0.05),

K (0.32989338),  $R^2$  (0.00374335), and OR (0.791 or 1.243). Finally, a statistical power of 80% would be reached.

Abbreviations:  $\alpha$ , type-I error rate; K, the proportion of cases in the outcome study;  $R^2$ , the variance explained by the tea consumption-associated instrumental variables; OR, odds ratio. CARDIoGRAMplusC4D, Coronary ARtery DIsease Genome-wide Replication and Meta-analysis (CARDIoGRAM) plus The Coronary Artery Disease (C4D) Genetics; HERMES, Heart Failure Molecular Epidemiology for Therapeutic Targets. <sup>†</sup>: The required OR were the minimal effects of tea consumption on each CVD outcome to achieve 80% statistical power.

**Supplementary Table 5.** Supplementary analyses of the association between tea consumption and cardiovascular diseases with instrumental variables selected at P-value threshold of  $5 \times 10^{-7}$ .

| Outcomes | Data source       | SNPs | $P_{\text{Cochran's Q}}$ | $I^2$ (%) | Weighted median method |       | MR-Egger regression |       |                        | MR-PRESSO         |       |                          | Outlier   |
|----------|-------------------|------|--------------------------|-----------|------------------------|-------|---------------------|-------|------------------------|-------------------|-------|--------------------------|-----------|
|          |                   |      |                          |           | OR (95% CI)            | P     | OR (95% CI)         | P     | $P_{\text{intercept}}$ | OR (95% CI)       | P     | $P_{\text{global test}}$ |           |
| CAD      | CARDIoGRAMplusC4D | 29   | 0.020                    | 38.4      | 1.00 (0.88, 1.13)      | 0.979 | 1.10 (0.89, 1.35)   | 0.376 | 0.748                  | -*                | -*    | 0.012                    | 0         |
| CAD      | FinnGen           | 26   | 0.424                    | 2.7       | 1.10 (0.97, 1.24)      | 0.150 | 1.11 (0.91, 1.34)   | 0.317 | 0.419                  | -*                | -*    | 0.456                    | 0         |
| MI       | CARDIoGRAMplusC4D | 29   | 0.269                    | 12.9      | 0.95 (0.84, 1.08)      | 0.451 | 1.02 (0.84, 1.24)   | 0.824 | 0.968                  | -*                | -*    | 0.184                    | 0         |
| MI       | FinnGen           | 26   | 0.085                    | 28.9      | 1.04 (0.89, 1.21)      | 0.611 | 1.07 (0.81, 1.40)   | 0.642 | 0.843                  | -*                | -*    | 0.113                    | 0         |
| AF       | Nielsen et al.    | 29   | 4.49E-06                 | 62.3      | 0.98 (0.91, 1.05)      | 0.569 | 1.05 (0.89, 1.25)   | 0.560 | 0.819                  | 0.99 (0.94, 1.05) | 0.737 | <4E-04                   | rs2117137 |
| AF       | FinnGen           | 25   | 0.006                    | 46.7      | 1.04 (0.89, 1.22)      | 0.593 | 1.12 (0.83, 1.50)   | 0.467 | 0.414                  | -*                | -*    | 0.009                    | 0         |
| HF       | HERMES            | 28   | 0.042                    | 34.0      | 0.99 (0.91, 1.07)      | 0.744 | 0.98 (0.83, 1.14)   | 0.759 | 0.291                  | -*                | -*    | 0.058                    | 0         |
| HF       | FinnGen           | 26   | 0.142                    | 23.2      | 0.97 (0.86, 1.09)      | 0.583 | 0.97 (0.81, 1.17)   | 0.779 | 0.949                  | -*                | -*    | 0.157                    | 0         |

SNPs, single nucleotide polymorphisms; MR-PRESSO indicates MR-pleiotropy residual sum and outlier; OR, odds ratio; CI, confidence interval; CAD, coronary artery disease; MI, myocardial infarction; AF, atrial fibrillation; HF, heart failure; CARDIoGRAMplusC4D, Coronary ARtery DIsease Genome-wide Replication and Meta-analysis (CARDIoGRAM) plus The Coronary Artery Disease (C4D) Genetics; HERMES, Heart Failure Molecular Epidemiology for Therapeutic Targets; \*, the result was the same as the inverse-variance weighted method due to no outlier detected.
